# Supplementary material
Source: PubMed Central journal article supplement (PMC1664976)

Distal colon

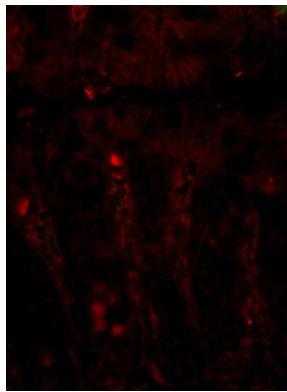

LAT2 (red),  
4F2hc (green)

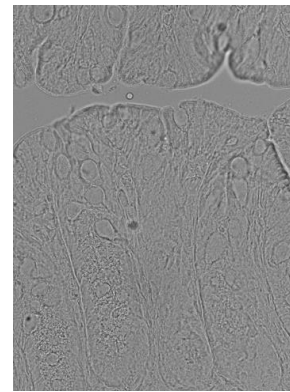

Phase contrast

Supplement: tjp344S1.pdf [file tjp344S1.pdf]

y+-LAT1 (red), 4F2hc (green)

Stomach

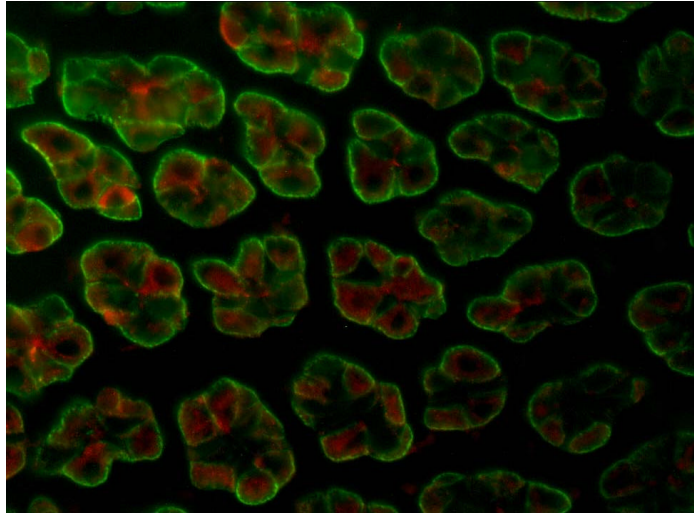

Distal colon

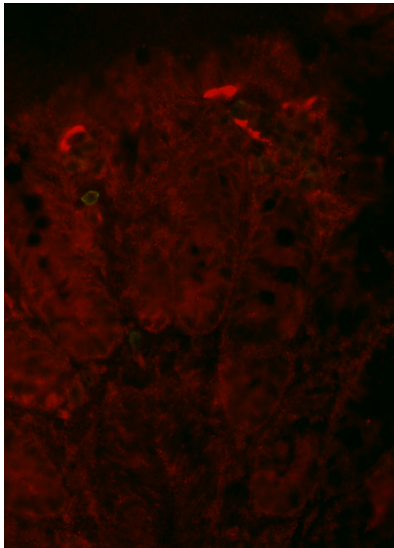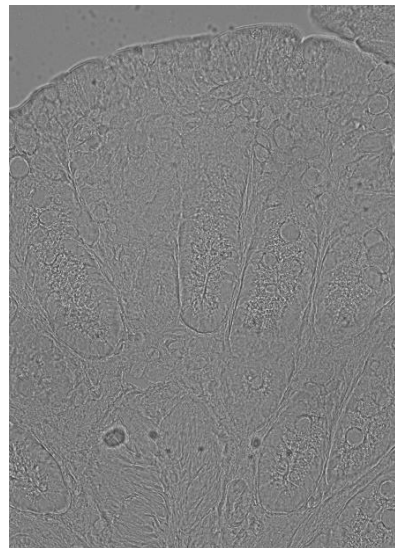

y+-LAT1 (red),  
4F2hc (green)

Phase contrast

Supplement: tjp344S2.pdf [file tjp344S2.pdf]
